# Supplementary material for: Patterns and correlates of objectively measured free-living physical activity in adults in rural and urban Cameroon
Source: HighWire-hosted journal article supplement (doi:10.1136/jech-2014-205154), 2015-04-03
Supplement: jech-2014-205154supp_figures.pdf [file jech-2014-205154supp_figures.pdf]

Distribution of monitored days

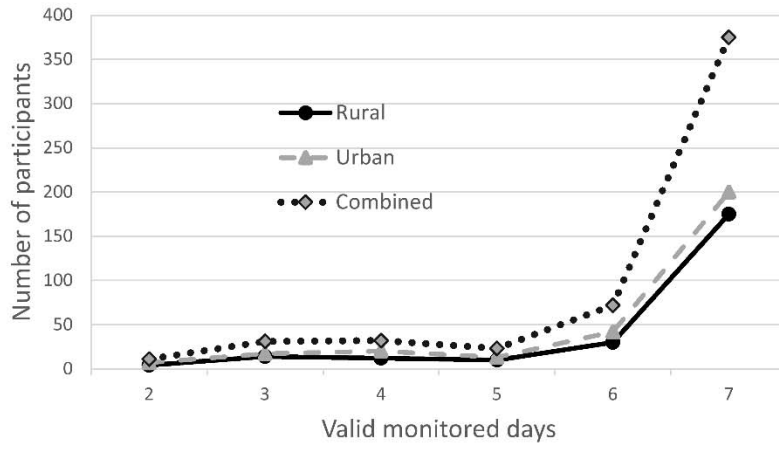

**Suppl Figure 1:** Distribution of valid monitored days between rural and urban dwellers.
